# Supplementary material for: Mapping of the CaPP2C35 Gene Involved in the Formation of Light-Green Immature Pepper (Capsicum Annuum L.) Fruits via GWAS and BSA
Source: Research Square preprint supplement (doi:10.21203/rs.3.rs-894733/v1), 2021-09-22
Supplement: Supplementary file 1 [file dd6e99981a5142ec8c0ff433.xlsx]

## Sheet: Pigment content
Supplenmentary Data 1 Pigment content analysis of 17C658 and 17C827 fruits
Pigment	Accession	Organ	5D	9D	12D	16D	20D	25D	30D	M
Chlorophyll a (mg/g·FW)	17C658	Ex	0.165425	0.123666	0.224628	0.186605	0.173907	0.147047	0.110243	0.115703
	17C658	Me and En			0.0847186	0.0676458	0.0601777	0.0474611	0.0447548	0.0451224
	17C827	Ex	0.235746	0.131391	0.152776	0.0878679	0.0658683	0.04428	0.0359824	0.0493236
	17C827	Me and En			0.124185	0.0568293	0.0355791	0.0238801	0.0232835	0.0304997
Chlorophyll b (mg/g·FW)	17C658	Ex	0.085626	0.0702019	0.112545	0.092599	0.0896777	0.0778561	0.0631195	0.0650811
	17C658	Me and En			0.0649447	0.0523271	0.041041	0.0419507	0.0425496	0.0556077
	17C827	Ex	0.146537	0.0772794	0.0845064	0.0504846	0.0404109	0.0342671	0.03599	0.0457025
	17C827	Me and En			0.0759757	0.0438088	0.0351503	0.0341256	0.0239272	0.0251192
Chlorophyll (total) (mg/g·FW)	17C658	Ex	0.251051	0.193868	0.337173	0.28525	0.269698	0.251171	0.170839	0.169149
	17C658	Me and En			0.154182	0.124404	0.109686	0.0878269	0.0873043	0.10073
	17C827	Ex	0.382283	0.20867	0.247577	0.138352	0.102319	0.0770606	0.0719724	0.0950261
	17C827	Me and En			0.158766	0.100638	0.0733192	0.0579481	0.0472107	0.0723422
Carotenoid (mg/g·FW)	17C658	Ex	0.0450338	0.0306275	0.0473724	0.0423671	0.0340329	0.0345288	0.0306258	0.0465508
	17C658	Me and En			0.0138061	0.0137499	0.0103825	0.00613222	0.00544199	0.0127134
	17C827	Ex	0.0474112	0.0264097	0.0278445	0.0155994	0.0111468	0.00809859	0.00544228	0.00539501
	17C827	Me and En			0.00628238	0.0066602	0.003786	0.00283858	0.00368453	0.00593377
NOTE: 5D, 9D, 12D, 16D, 20D, 25D, 30D and M are 5 days, 9 days, 12 days, 16 days, 20 days, 25 days, 30 days after anthesis and immature stage (or 35 days after anthesis), respectively. The carotenoid content or total chlorophyll content at 5D and 9D are that in intact pepper pericarp (including exocarp, endocarp and mesocarp). Ex indicates the exocarp of pepper fruits. Me indicates the mesocarp o…

## Sheet: Chloroplast observation
Supplenmentary Data 2 The number of chloroplast and chloroplast grana in the exocarp of 17C658 and 17C827 fruits
	17C658	17C827
Chp(9D)	5.55556	6.2
Gl(9D)	11	11.3333
Chp(20D)	5.38462	3.69231
Gl(20D)	16.2333	15.6667
NOTE: Chp and Gl are the chloroplasts number of unicellular and the chloroplast grana number of single chloroplast in exocarp of pepper fruits, respectively.9D and 12D are 9 days and 20 days after anthesis, respectively. Data is means of three independent replicates.
Supplenmentary Data 3 Cross-section perimeter of chloroplast in the exocarp of 17C658 and 17C827 fruits
	17C658	17C827
Per(9D) /um	5.91946	7.58266
Per(20D) /um	11.5283	8.23606
Per(20D)-Per(9D) /um	5.60884	0.6534
NOTE: Per is cross-section perimeter of chloroplast in exocarp of pepper fruits. Per(20D)-Per(9D) is the increments of the chloroplast cross-section perimeter from 9D to 20D. 9D and 12D are 9 days and 20 days after anthesis, respectively. Data is means of three independent replicates.
Supplenmentary Data 4 Cross-section area of chloroplast in the exocarp of 17C658 and 17C827 fruits
	17C658	17C827
Area(9D) /um^2	1.84056	3.35259
Area(20D) /um^2	5.92108	3.40418
Area(20D)-Area(9D) /um^2	4.08052	0.0515856
NOTE: Area are cross-section area of chloroplast in exocarp of pepper fruits. Area(20D)-Area(9D) are the increments of the chloroplast cross-section area from 9D to 20D. 9D and 12D are 9 days and 20 days after anthesis, respectively. Data is means of three independent replicates.

## Sheet: Thickness of flesh
Supplenmentary Data 5 Thickness of flesh of 17C658 and 17C827 fruits
Accession	Fruit 1	Fruit 2	Fruit 3	Means
17C658	3.47 mm	4.38 mm	4.51 mm	4.12 mm
17C827	1.37 mm	2.02 mm	2.78 mm	2.06 mm
